# Supplementary material
Source: ML conference proceedings conference paper supplement (https://proceedings.neurips.cc/paper_files/paper/2017/hash/07563a3fe3bbe7e3ba84431ad9d055af-Abstract.html)
Supplement: Supplementary file [file 07563a3fe3bbe7e3ba84431ad9d055af-Supplemental.zip]

## 6 Supplemental Materials: Mathematical Proofs

This section shows the detailed proofs to the proposed theorems.

### 6.1 Basic Lemmas

The following lemma reveals the fact that the isomeric property is related to the invertibility of the sub-matrices of a basis matrix.

**Lemma 6.1.** *Let  $\Omega \subseteq \{1, 2, \dots, m\} \times \{1, 2, \dots, n\}$  and  $U_0 \in \mathbb{R}^{m \times r}$  be the basis matrix of a subspace embedded in  $\mathbb{R}^m$ . Denote the  $i$ th row of  $U_0$  as  $u_i^T$ , i.e.,  $U_0 = [u_1^T; u_2^T; \dots; u_m^T]$ . Define  $\delta_{ij}$  as*

$$\delta_{ij} = \begin{cases} 1, & \text{if } (i, j) \in \Omega, \\ 0, & \text{otherwise.} \end{cases} \quad (10)$$

*Then the matrices,  $\sum_{i=1}^m \delta_{ij} u_i u_i^T$ ,  $\forall 1 \leq j \leq n$ , are all invertible if and only if  $U_0$  is  $\Omega$ -isomeric.*

*Proof.* Note that

$$([U_0]_{\Omega^j, :})^T ([U_0]_{\Omega^j, :}) = [\delta_{1j} u_1, \delta_{2j} u_2, \dots, \delta_{mj} u_m] \begin{bmatrix} \delta_{1j} u_1^T \\ \delta_{2j} u_2^T \\ \vdots \\ \delta_{mj} u_m^T \end{bmatrix} = \sum_{i=1}^m (\delta_{ij})^2 u_i u_i^T = \sum_{i=1}^m \delta_{ij} u_i u_i^T.$$

Now, it is easy to see that  $\sum_{i=1}^m \delta_{ij} u_i u_i^T$  is invertible is equivalent to that  $([U_0]_{\Omega^j, :})^T ([U_0]_{\Omega^j, :})$  is positive definite, which is further equivalent to that  $\text{rank}([U_0]_{\Omega^j, :}) = \text{rank}(U_0)$ ,  $\forall j = 1, \dots, n$ .  $\square$

The next lemma will be used multiple times in the proof.

**Lemma 6.2.** *Let  $\Omega \subseteq \{1, 2, \dots, m\} \times \{1, 2, \dots, n\}$  and  $\mathcal{P}$  be an orthogonal projection onto some subspace of  $\mathbb{R}^{m \times n}$ . If  $\|\mathcal{P} \mathcal{P}_\Omega^\perp \mathcal{P}\| < 1$  then  $\mathcal{P} \mathcal{P}_\Omega \mathcal{P}$  is an invertible operator.*

*Proof.* Provided that  $\|\mathcal{P} \mathcal{P}_\Omega^\perp \mathcal{P}\| < 1$ ,  $\mathcal{I} + \sum_{i=1}^\infty (\mathcal{P} \mathcal{P}_\Omega^\perp \mathcal{P})^i$  is well defined. Also, notice that

$$\mathcal{P} \mathcal{P}_\Omega \mathcal{P} = \mathcal{P}(\mathcal{I} - \mathcal{P}_\Omega^\perp) \mathcal{P} = \mathcal{P}(\mathcal{I} - \mathcal{P} \mathcal{P}_\Omega^\perp \mathcal{P}).$$

Thus, for any  $M \in \mathcal{P}$ , the following holds:

$$\begin{aligned} & \mathcal{P} \mathcal{P}_\Omega \mathcal{P} (\mathcal{I} + \sum_{i=1}^\infty (\mathcal{P} \mathcal{P}_\Omega^\perp \mathcal{P})^i) (M) \\ &= \mathcal{P}(\mathcal{I} - \mathcal{P} \mathcal{P}_\Omega^\perp \mathcal{P}) (\mathcal{I} + \sum_{i=1}^\infty (\mathcal{P} \mathcal{P}_\Omega^\perp \mathcal{P})^i) (M) \\ &= \mathcal{P}(\mathcal{I} + \sum_{i=1}^\infty (\mathcal{P} \mathcal{P}_\Omega^\perp \mathcal{P})^i - \mathcal{P} \mathcal{P}_\Omega^\perp \mathcal{P} - \sum_{i=2}^\infty (\mathcal{P} \mathcal{P}_\Omega^\perp \mathcal{P})^i) (M) \\ &= \mathcal{P}(M) = M. \end{aligned}$$

In a similar way, it could be also verified that  $(\mathcal{I} + \sum_{i=1}^\infty (\mathcal{P} \mathcal{P}_\Omega^\perp \mathcal{P})^i) \mathcal{P} \mathcal{P}_\Omega \mathcal{P} (M) = M$ . As a consequence,  $\mathcal{I} + \sum_{i=1}^\infty (\mathcal{P} \mathcal{P}_\Omega^\perp \mathcal{P})^i$  is the inverse operator of  $\mathcal{P} \mathcal{P}_\Omega \mathcal{P}$ .  $\square$

**Lemma 6.3.** *Let  $\Omega \subseteq \{1, 2, \dots, m\} \times \{1, 2, \dots, n\}$  and  $\mathcal{P}$  be an orthogonal projection onto some subspace of  $\mathbb{R}^{m \times n}$ . If  $\|\mathcal{P} \mathcal{P}_\Omega^\perp \mathcal{P}\| < 1$  then  $\mathcal{P} \cap \mathcal{P}_\Omega^\perp = \{0\}$ .*

*Proof.* Suppose that  $M \in \mathcal{P} \cap \mathcal{P}_\Omega^\perp$ , i.e.,  $M = \mathcal{P}(M) = \mathcal{P}_\Omega^\perp(M)$ . Then we have  $M = \mathcal{P} \mathcal{P}_\Omega^\perp \mathcal{P}(M)$  and thus

$$\|M\|_F = \|\mathcal{P} \mathcal{P}_\Omega^\perp \mathcal{P}(M)\|_F \leq \|\mathcal{P} \mathcal{P}_\Omega^\perp \mathcal{P}\| \|M\|_F \leq \|M\|_F.$$

Since  $\|\mathcal{P} \mathcal{P}_\Omega^\perp \mathcal{P}\| < 1$ , the last equality above can hold only when  $M = 0$ .  $\square$

The following lemma is well-known.

**Lemma 6.4** (Lemma 11 of [29]). *For any matrices  $M, N, W$  and  $Z$  of consistent sizes, we have that*

$$\left\| \begin{bmatrix} M & N \\ W & Z \end{bmatrix} \right\|_* \geq \|M\|_*,$$

where the equality can hold if and only if  $N = 0$ ,  $W = 0$  and  $Z = 0$ .

*Proof.* By Lemma 11 of [29],

$$\left\| \begin{bmatrix} M & N \\ W & Z \end{bmatrix} \right\|_* \geq \|[M, N]\|_* \geq \|M\|_*.$$

The validity of the first equality requires that  $W = 0$  and  $Z = 0$ . The second equality demands  $N = 0$ .  $\square$

## 6.2 Critical Lemmas

The following lemma (i.e., Theorem 3.1) has a critical role in the proof.

**Lemma 6.5** (Theorem 3.1). *Let  $L_0 \in \mathbb{R}^{m \times n}$  and  $\Omega \subseteq \{1, 2, \dots, m\} \times \{1, 2, \dots, n\}$ . Let the SVD of  $L_0$  be  $U_0 \Sigma_0 V_0^T$ . Denote  $\mathcal{P}_{U_0}(\cdot) = U_0 U_0^T(\cdot)$  and  $\mathcal{P}_{V_0}(\cdot) = (\cdot) V_0 V_0^T$ . Then we have the following:*

1. *The linear operator  $\mathcal{P}_{U_0} \mathcal{P}_\Omega \mathcal{P}_{U_0}$  is invertible if and only if  $U_0$  is  $\Omega$ -isomeric.*
2. *The linear operator  $\mathcal{P}_{V_0} \mathcal{P}_\Omega \mathcal{P}_{V_0}$  is invertible if and only if  $V_0$  is  $\Omega^T$ -isomeric.*

*Proof.* The above two claims are proved in the same way, and thereby we only present the proof to first one. Since the operator  $\mathcal{P}_{U_0} \mathcal{P}_\Omega \mathcal{P}_{U_0}$  is linear and  $\mathcal{P}_{U_0}$  is a linear space of finite dimension, the sufficiency can be proved by showing that  $\mathcal{P}_{U_0} \mathcal{P}_\Omega \mathcal{P}_{U_0}$  is an injection. That is, we need to prove that the following linear system has no nonzero solution:

$$\mathcal{P}_{U_0} \mathcal{P}_\Omega \mathcal{P}_{U_0}(M) = 0, \text{ s.t. } M \in \mathcal{P}_{U_0}.$$

Assume that  $\mathcal{P}_{U_0} \mathcal{P}_\Omega \mathcal{P}_{U_0}(M) = 0$ . Then we have

$$U_0^T \mathcal{P}_\Omega (U_0 U_0^T M) = 0.$$

Denote the  $i$ th row and  $j$ th column of  $U_0$  and  $U_0^T M$  as  $u_i^T$  and  $b_j$ , respectively. That is,  $U_0 = [u_1^T; u_2^T; \dots; u_m^T]$  and  $U_0^T M = [b_1, b_2, \dots, b_n]$ . Define  $\delta_{ij}$  as in (10). Then the  $j$ th column of  $U_0^T \mathcal{P}_\Omega (U_0 U_0^T M)$  is given by

$$U_0^T \begin{bmatrix} \delta_{1j} u_1^T b_j \\ \delta_{2j} u_2^T b_j \\ \vdots \\ \delta_{mj} u_m^T b_j \end{bmatrix} = \left( \sum_{i=1}^m \delta_{ij} u_i u_i^T \right) b_j.$$

By Lemma 6.1, the matrix  $\sum_{i=1}^m \delta_{ij} u_i u_i^T$  is invertible. Hence,  $U_0^T \mathcal{P}_\Omega (U_0 U_0^T M) = 0$  implies that

$$b_j = 0, \forall j = 1, \dots, n,$$

i.e.,  $U_0^T M = 0$ . By the assumption of  $M \in \mathcal{P}_{U_0}$ ,  $M = 0$ .

It remains to prove the necessity. Assume that  $U_0$  is not  $\Omega$ -isomeric. By Lemma 6.1, there exists  $j$  such that the matrix  $\sum_{i=1}^m \delta_{ij} u_i u_i^T$  is singular and therefore has a nonzero null space. So, there exists  $M_1 \neq 0$  such that  $U_0^T \mathcal{P}_\Omega (U_0 M_1) = 0$ . Let  $M = U_0 M_1$ . Then we have  $M \neq 0$ ,  $M \in \mathcal{P}_{U_0}$  and

$$\mathcal{P}_{U_0} \mathcal{P}_\Omega \mathcal{P}_{U_0}(M) = 0.$$

This contradicts the assumption that  $\mathcal{P}_{U_0} \mathcal{P}_\Omega \mathcal{P}_{U_0}$  is invertible. As a consequence,  $U_0$  must be  $\Omega$ -isomeric.  $\square$

By Lemma 6.2,  $\|\mathcal{P}_{U_0} \mathcal{P}_\Omega^\perp \mathcal{P}_{U_0}\| < 1$  also leads to the invertibility of  $\mathcal{P}_{U_0} \mathcal{P}_\Omega \mathcal{P}_{U_0}$ . So, according to Lemma 6.5,  $\|\mathcal{P}_{U_0} \mathcal{P}_\Omega^\perp \mathcal{P}_{U_0}\| < 1$  should be related to the isomeric property. This is true, as shown in the following lemma.

**Lemma 6.6.** Let  $L_0 \in \mathbb{R}^{m \times n}$  and  $\Omega \subseteq \{1, 2, \dots, m\} \times \{1, 2, \dots, n\}$ . Let the SVD of  $L_0$  be  $U_0 \Sigma_0 V_0^T$ . Denote  $\mathcal{P}_{U_0}(\cdot) = U_0 U_0^T(\cdot)$  and  $\mathcal{P}_{V_0}(\cdot) = (\cdot) V_0 V_0^T$ . Then we have the following:

1.  $\|\mathcal{P}_{U_0} \mathcal{P}_\Omega^\perp \mathcal{P}_{U_0}\| < 1$  if and only if  $U_0$  is  $\Omega$ -isomeric.
2.  $\|\mathcal{P}_{V_0} \mathcal{P}_\Omega^\perp \mathcal{P}_{V_0}\| < 1$  if and only if  $V_0$  is  $\Omega^T$ -isomeric.

*Proof.* The necessity could be proved by Lemma 6.2 and Lemma 6.5, and thereby we only need to prove the sufficiency. Denote  $\delta_{ij}$  as in (10) and define a diagonal matrix  $D_j$  as  $D_j = \text{diag}(\delta_{1j}, \delta_{2j}, \dots, \delta_{mj}) \in \mathbb{R}^{m \times m}$ . Then we have

$$([U_0]_{\Omega^j, :})^T ([U_0]_{\Omega^j, :}) = U_0^T D_j^T D_j U_0 = U_0^T D_j U_0.$$

By Lemma 6.1,  $U_0^T D_j U_0$  is positive definite and therefore has positive singular values. Also, we have  $\|U_0^T D_j U_0\| \leq \|D_j\| \leq 1$ . As a consequence,

$$\sigma_j \mathbf{I} \preceq U_0^T D_j U_0 \preceq \mathbf{I},$$

where  $\sigma_j > 0$  is the minimal singular value of  $U_0^T D_j U_0$ . Denote the  $j$ th column of  $\mathcal{P}_{U_0}(M)$  as  $b_j$ . Then we have

$$\begin{aligned} \|[\mathcal{P}_{U_0} \mathcal{P}_\Omega^\perp \mathcal{P}_{U_0}(M)]_{:,j}\|_2 &= \|U_0 U_0^T b_j - U_0 (U_0^T D_j U_0) U_0^T b_j\|_2 \\ &= \|(\mathbf{I} - U_0^T D_j U_0) U_0^T b_j\|_2 \leq \|(\mathbf{I} - U_0^T D_j U_0)\| \|U_0^T b_j\|_2 \\ &= (1 - \sigma_j) \|U_0^T b_j\|_2 = (1 - \sigma_j) \|b_j\|_2, \forall j = 1, \dots, n, \end{aligned}$$

which implies that

$$\begin{aligned} \|\mathcal{P}_{U_0} \mathcal{P}_\Omega^\perp \mathcal{P}_{U_0}(M)\|_F^2 &\leq \sum_{j=1}^n (1 - \sigma_j)^2 \|b_j\|_2^2 \\ &\leq (1 - \sigma_{\min})^2 \|\mathcal{P}_{U_0}(M)\|_F^2, \end{aligned}$$

where  $\sigma_{\min} = \min_j \{\sigma_j\} > 0$ . Hence,

$$\|\mathcal{P}_{U_0} \mathcal{P}_\Omega^\perp \mathcal{P}_{U_0}\| \leq 1 - \sigma_{\min} < 1.$$

□

Lemma 6.5 and Lemma 6.6 imply that  $\|\mathcal{P}_{U_0} \mathcal{P}_\Omega^\perp \mathcal{P}_{U_0}\| < 1$  is a sufficient and necessary condition for  $\mathcal{P}_{U_0} \mathcal{P}_\Omega \mathcal{P}_{U_0}$  to be invertible. In fact, this is true for any orthogonal projections, as stated in the following lemma.

**Lemma 6.7.** Let  $\Omega \subseteq \{1, 2, \dots, m\} \times \{1, 2, \dots, n\}$  and  $\mathcal{P}$  be an orthogonal projection onto some  $r$ -dimensional subspace of  $\mathbb{R}^{m \times n}$ . Then the linear operator,  $\mathcal{P} \mathcal{P}_\Omega \mathcal{P}$ , is an invertible operator if and only if  $\|\mathcal{P} \mathcal{P}_\Omega^\perp \mathcal{P}\| < 1$ .

*Proof.* The sufficiency has been proven by Lemma 6.2, and thus we only need to prove that  $\|\mathcal{P} \mathcal{P}_\Omega^\perp \mathcal{P}\| < 1$  is necessary. Let  $\text{vec}(\cdot)$  denote the vectorization of a matrix formed by stacking the columns of the matrix into a single column vector. Suppose that the basis matrix associated with the operator  $\mathcal{P}$  is given by  $P \in \mathbb{R}^{mn \times r}$ ,  $P^T P = \mathbf{I}$ ; namely,

$$\text{vec}(\mathcal{P}(M)) = P P^T \text{vec}(M), \forall M \in \mathbb{R}^{m \times n}.$$

Denote  $\delta_{ij}$  as in (10) and define a diagonal matrix  $D$  as

$$D = \text{diag}(\delta_{11}, \delta_{21}, \dots, \delta_{ij}, \dots, \delta_{mn}) \in \mathbb{R}^{mn \times mn}.$$

Notice that

$$\begin{aligned} \mathcal{P}(M) &= \mathcal{P} \left( \sum_{i=1}^m \sum_{j=1}^n \langle M, e_i e_j^T \rangle e_i e_j^T \right) \\ &= \sum_{i=1}^m \sum_{j=1}^n \langle M, e_i e_j^T \rangle \mathcal{P}(e_i e_j^T), \end{aligned}$$

where  $e_i$  is the  $i$ th standard basis and  $\langle \cdot \rangle$  denotes the inner product between two matrices. With this notation, it is easy to see that

$$[\text{vec}(\mathcal{P}(e_1 e_1^T)), \text{vec}(\mathcal{P}(e_2 e_1^T)), \dots, \text{vec}(\mathcal{P}(e_m e_n^T))] = PP^T.$$

Similarly, we have

$$\mathcal{P}\mathcal{P}_\Omega\mathcal{P}(M) = \sum_{i=1}^m \sum_{j=1}^n \langle \mathcal{P}(M), e_i e_j^T \rangle (\delta_{ij} \mathcal{P}(e_i e_j^T)),$$

and thereby

$$\text{vec}(\mathcal{P}\mathcal{P}_\Omega\mathcal{P}(M)) = PP^T D P P^T \text{vec}(M).$$

For  $\mathcal{P}\mathcal{P}_\Omega\mathcal{P}$  to be invertible, the matrix  $P^T D P$  must be positive definite. To show this, let's assume that  $P^T D P$  is singular. Then there exists a vector,  $z \in \mathbb{R}^{mn}$ ,  $z \neq 0$ , that satisfies  $P^T D P z = 0$ . Let  $\text{vec}(M) = Pz$ . Then we have  $PP^T D P P^T \text{vec}(M) = PP^T D P z = 0$ . By  $z \neq 0$ ,  $\text{vec}(M) \neq 0$ . Hence, there exists  $M \in \mathcal{P}$  and  $M \neq 0$  such that  $\mathcal{P}\mathcal{P}_\Omega\mathcal{P}(M) = 0$ . This contradicts the assumption that  $\mathcal{P}\mathcal{P}_\Omega\mathcal{P}$  is invertible.

Denote the minimal singular value of  $P^T D P$  as  $\sigma_{\min} > 0$ . Then we have

$$\begin{aligned} \|\mathcal{P}\mathcal{P}_\Omega^\perp\mathcal{P}(M)\|_F^2 &= \|\text{vec}(\mathcal{P}\mathcal{P}_\Omega^\perp\mathcal{P}(M))\|_2^2 \\ &= \|PP^T(\mathbf{I} - D)PP^T \text{vec}(M)\|_2^2 \\ &= \|(\mathbf{I} - P^T D P)P^T \text{vec}(M)\|_2^2 \\ &\leq (1 - \sigma_{\min})^2 \|P^T \text{vec}(M)\|_2^2 \\ &= (1 - \sigma_{\min})^2 \|\mathcal{P}(M)\|_F^2, \end{aligned}$$

which gives that  $\|\mathcal{P}\mathcal{P}_\Omega^\perp\mathcal{P}\| \leq 1 - \sigma_{\min} < 1$ .  $\square$

The following lemma has been used in our discussions.

**Lemma 6.8.** *Let  $\Omega \subseteq \{1, 2, \dots, m\} \times \{1, 2, \dots, n\}$  and  $\mathcal{P}$  be an orthogonal projection onto some subspace of  $\mathbb{R}^{m \times n}$ . Then the operator,  $\mathcal{P}\mathcal{P}_\Omega\mathcal{P}$ , is invertible if and only if  $\mathcal{P} \cap \mathcal{P}_\Omega^\perp = \{0\}$ .*

*Proof.* The necessity has been proven by Lemma 6.7 and Lemma 6.3. So, it suffices to prove that  $\mathcal{P} \cap \mathcal{P}_\Omega^\perp = \{0\}$  can lead to the invertibility of the operator  $\mathcal{P}\mathcal{P}_\Omega\mathcal{P}$ . Consider a nonzero matrix  $M \in \mathcal{P}$ . Then we have

$$\|M\|_F^2 = \|\mathcal{P}(M)\|_F^2 = \|\mathcal{P}_\Omega\mathcal{P}(M) + \mathcal{P}_\Omega^\perp\mathcal{P}(M)\|_F^2 = \|\mathcal{P}_\Omega\mathcal{P}(M)\|_F^2 + \|\mathcal{P}_\Omega^\perp\mathcal{P}(M)\|_F^2,$$

which gives that

$$\|\mathcal{P}\mathcal{P}_\Omega^\perp\mathcal{P}(M)\|_F^2 \leq \|\mathcal{P}_\Omega^\perp\mathcal{P}(M)\|_F^2 = \|M\|_F^2 - \|\mathcal{P}_\Omega\mathcal{P}(M)\|_F^2.$$

By  $\mathcal{P} \cap \mathcal{P}_\Omega^\perp = \{0\}$ ,  $\mathcal{P}_\Omega\mathcal{P}(M) \neq 0$ . Thus,

$$\|\mathcal{P}\mathcal{P}_\Omega^\perp\mathcal{P}\|^2 \leq 1 - \inf_{\|M\|_F=1} \|\mathcal{P}_\Omega\mathcal{P}(M)\|_F^2 < 1.$$

Again, by Lemma 6.7, the operator  $\mathcal{P}\mathcal{P}_\Omega\mathcal{P}$  is invertible.  $\square$

Consider a twinned problem of (7); namely,

$$\min_A \|A\|_*, \text{ s.t. } \mathcal{P}_\Omega(AX - L_0) = 0, \quad (11)$$

where  $X \in \mathbb{R}^{p \times n}$  is supposed to be given. Similar to Theorem 3.4, we have the following lemma to guarantee the success of the above convex program.

**Lemma 6.9.** *Let  $X \in \mathbb{R}^{p \times n}$  be a given matrix and  $\Omega \subseteq \{1, 2, \dots, m\} \times \{1, 2, \dots, n\}$ . If  $L_0^T \in \text{span}\{X^T\}$  and  $X^T$  is  $\Omega^T$ -isomeric then  $A_0 = L_0 X^+$  is the unique minimizer to the problem in (11).*

*Proof.* Denote the SVDs of  $L_0$ ,  $X$  and  $L_0X^+$  as  $U_0\Sigma_0V_0^T$ ,  $U_1\Sigma_1V_1^T$  and  $U_2\Sigma_2V_2^T$ , respectively. By  $L_0^T \in \text{span}\{X^T\}$ ,  $V_0 = V_1V_1^TV_0$  and thus

$$A_0X = L_0X^+X = L_0V_1V_1^T = L_0.$$

That is,  $A_0 = L_0X^+$  is feasible to (11). By standard convexity arguments [30],  $A_0 = L_0X^+$  is an optimal solution to the problem in (11) if there exists a matrix  $W$  (Lagrange multiplier) that obeys

$$\mathcal{P}_\Omega(W)X^T \in \partial\|L_0X^+\|_*,$$

where  $\partial(\cdot)$  is the subgradient of a function. By Lemma 3.1,  $V_1$  is  $\Omega^T$ -isomeric. Then Lemma 6.5 gives that  $\mathcal{P}_{V_1}\mathcal{P}_\Omega\mathcal{P}_{V_1}$  is an invertible operator. Hence, we could define  $W$  as

$$W = \mathcal{P}_{V_1}(\mathcal{P}_{V_1}\mathcal{P}_\Omega\mathcal{P}_{V_1})^{-1}(U_2V_2^T(X^T)^+).$$

With this notation, it can be calculated that

$$\begin{aligned} \mathcal{P}_\Omega(W)X^T &= \mathcal{P}_{V_1}\mathcal{P}_\Omega(W)X^T \\ &= \mathcal{P}_{V_1}\mathcal{P}_\Omega\mathcal{P}_{V_1}(\mathcal{P}_{V_1}\mathcal{P}_\Omega\mathcal{P}_{V_1})^{-1}(U_2V_2^T(X^T)^+)X^T \\ &= U_2V_2^T(X^T)^+X^T = U_2V_2^TU_1U_1^T. \end{aligned}$$

Since  $(L_0X^+)^T \in \text{span}\{X\}$ , we have

$$V_2^TU_1U_1^T = V_2^T, \text{ i.e., } V_2 \subseteq U_1.$$

As a result,

$$\mathcal{P}_\Omega(W)X^T = U_2V_2^TU_1U_1^T = U_2V_2^T \in \partial\|L_0X^+\|_*,$$

which gives that  $L_0X^+$  is an optimal solution to the convex optimization problem in (11).

It remains to prove that the optimal solution to (11) is unique. We shall consider a feasible perturbation  $A = L_0X^+ + \Delta$  and show that the objective strictly increases whenever  $\Delta \neq 0$ . We have

$$0 = \mathcal{P}_\Omega(AX - L_0) = \mathcal{P}_\Omega(L_0X^+X - L_0 + \Delta X),$$

which gives that

$$\mathcal{P}_\Omega(\Delta X) = 0, \text{ i.e., } \Delta X \in \mathcal{P}_\Omega^\perp.$$

We also have  $\Delta X \in \mathcal{P}_{V_1}$ , and thus  $\Delta X \in \mathcal{P}_{V_1} \cap \mathcal{P}_\Omega^\perp$ . However, by Lemma 6.6 and Lemma 6.3,  $\mathcal{P}_{V_1} \cap \mathcal{P}_\Omega^\perp = \{0\}$ . As a consequence,

$$\Delta X = 0, \text{ i.e., } \Delta^T \in U_1^\perp \subseteq V_2^\perp,$$

where  $U_1^\perp \subseteq V_2^\perp$  follows from  $V_2 \subseteq U_1$ . Then we have

$$\begin{aligned} \|L_0X^+ + \Delta\|_* &= \left\| \begin{bmatrix} U_2^T \\ (U_2^\perp)^T \end{bmatrix} (L_0X^+ + \Delta)[V_2, V_2^\perp] \right\|_* \\ &= \left\| \begin{bmatrix} U_2^T L_0X^+ V_2 & U_2^T \Delta V_2^\perp \\ 0 & (U_2^\perp)^T \Delta V_2^\perp \end{bmatrix} \right\|_*. \end{aligned}$$

By Lemma 6.4,

$$\|L_0X^+ + \Delta\|_* \geq \|U_2^T L_0X^+ V_2\|_* = \|L_0X^+\|_*,$$

where the equality can hold if and only if

$$U_2^T \Delta V_2^\perp = 0 \text{ and } (U_2^\perp)^T \Delta V_2^\perp = 0.$$

This gives that  $\Delta V_2^\perp = 0$ , i.e.,  $\Delta^T \in V_2$ . However, we have already proven that  $\Delta^T \in V_2^\perp$ . Thus,  $\|L_0X^+ + \Delta\|_*$  is strictly greater than  $\|L_0X^+\|_*$  unless  $\Delta = 0$ . In other words,  $A_0 = L_0X^+$  is the unique minimizer to (11).  $\square$

### 6.3 Proof to Theorem 3.2

*Proof.* Let the SVD of  $L_0$  be  $U_0 \Sigma_0 V_0^T$ . Denote  $\mathcal{P}_{U_0}(\cdot) = U_0 U_0^T(\cdot)$ ,  $\mathcal{P}_{V_0}(\cdot) = (\cdot) V_0 V_0^T$  and  $\mathcal{P}_{T_0}(\cdot) = \mathcal{P}_{U_0}(\cdot) + \mathcal{P}_{V_0}(\cdot) - \mathcal{P}_{U_0} \mathcal{P}_{V_0}(\cdot)$ . Suppose that  $L_0$  is incoherent,  $\text{rank}(L_0) \leq \delta n_2 / (c \log n_1)$  and  $\Omega$  is a 2D index set sampled using a Bernoulli model,

$$\Pr((i, j) \in \Omega) = \rho_0 > \delta.$$

Under these conditions, Theorem 4.1 of [4] has proven that

$$\|\mathcal{P}_{T_0} \mathcal{P}_{\Omega}^{\perp} \mathcal{P}_{T_0}\| < 1 - \rho_0 + \delta < 1$$

holds with high probability. Note that

$$\begin{aligned} \mathcal{P}_{U_0} \mathcal{P}_{T_0}(M) &= \mathcal{P}_{U_0}(\mathcal{P}_{U_0}(M) + \mathcal{P}_{V_0}(M) - \mathcal{P}_{U_0} \mathcal{P}_{V_0}(M)) \\ &= \mathcal{P}_{U_0}(M) \end{aligned}$$

and

$$\begin{aligned} \mathcal{P}_{T_0} \mathcal{P}_{U_0}(M) &= \mathcal{P}_{U_0} \mathcal{P}_{U_0}(M) + \mathcal{P}_{V_0} \mathcal{P}_{U_0}(M) - \mathcal{P}_{U_0} \mathcal{P}_{V_0} \mathcal{P}_{U_0}(M) \\ &= \mathcal{P}_{U_0}(M). \end{aligned}$$

Hence,

$$\begin{aligned} \|\mathcal{P}_{U_0} \mathcal{P}_{\Omega}^{\perp} \mathcal{P}_{U_0}\| &= \|\mathcal{P}_{U_0} \mathcal{P}_{T_0} \mathcal{P}_{\Omega}^{\perp} \mathcal{P}_{T_0} \mathcal{P}_{U_0}\| \\ &\leq \|\mathcal{P}_{T_0} \mathcal{P}_{\Omega}^{\perp} \mathcal{P}_{T_0}\| < 1. \end{aligned}$$

By Lemma 6.6,  $U_0$  is  $\Omega$ -isometric. Then it follows from Lemma 3.1 that  $L_0$  is  $\Omega$ -isometric. Similarly, it could be proved that  $L_0^T$  is  $\Omega^T$ -isometric with high probability.  $\square$

### 6.4 Proof to Theorem 3.3

*Proof.* By  $y_0 \in \mathcal{S}_0 \subseteq \text{span}\{A\}$ ,  $y_0 = AA^+ y_0$ . By  $y_0 = [y_b; y_u]$  and  $A = [A_b; A_u]$ ,

$$y_b = A_b A^+ y_0.$$

That is,  $x_0 = A^+ y_0$  is a feasible solution to the problem in (6). Provided that  $y_b \in \mathbb{R}^k$  and the dictionary matrix  $A$  is  $k$ -isomeric, Definition 3.1 gives that

$$\text{rank}(A_b) = \text{rank}(A),$$

which implies that the rows of  $A_b$  can linearly represent the rows of  $A$ , i.e.,

$$\text{span}\{A_b^T\} = \text{span}\{A^T\}.$$

Since  $A^+ y_0 \in \text{span}\{A^T\}$ , it follows that there exists a dual vector  $w \in \mathbb{R}^p$  obeying

$$A_b^T w = A^+ y_0, \text{ i.e., } A_b^T w \in \partial \frac{1}{2} \|A^+ y_0\|_2^2.$$

By standard convexity arguments [30],  $x_0 = A^+ y_0$  is an optimal solution to (6). Since  $\|\cdot\|_2^2$  is strongly convex, the optimal solution to (6) is unique.  $\square$

### 6.5 Proof to Theorem 3.4

*Proof.* Denote the SVD of  $A$  as  $U \Sigma V$ . By  $L_0 \in \text{span}\{A\}$ ,  $AX_0 = AA^+ L_0 = UU^T L_0 = L_0$ ; that is,  $X_0 = A^+ L_0$  is a feasible solution to (7). By Lemma 3.1 and Lemma 6.5, the operator  $\mathcal{P}_U \mathcal{P}_{\Omega} \mathcal{P}_U$  is invertible. As a consequence, we could define a matrix  $W$  as

$$W = \mathcal{P}_U (\mathcal{P}_U \mathcal{P}_{\Omega} \mathcal{P}_U)^{-1} ((A^T)^+ X_0).$$

Then it can be calculated that

$$\begin{aligned} A^T \mathcal{P}_{\Omega}(W) &= A^T \mathcal{P}_U \mathcal{P}_{\Omega}(W) \\ &= A^T \mathcal{P}_U \mathcal{P}_{\Omega} \mathcal{P}_U (\mathcal{P}_U \mathcal{P}_{\Omega} \mathcal{P}_U)^{-1} ((A^T)^+ X_0) \\ &= A^T (A^T)^+ X_0 = V V^T X_0 \\ &= X_0 \in \partial \frac{1}{2} \|X_0\|_F^2, \end{aligned}$$

where  $V V^T X_0 = X_0$  is concluded from the fact that  $X_0 = A^+ L_0 \in \text{span}(A^T)$ . Since  $\|X\|_F^2$  is a strongly convex function of  $X$ , it follows from the standard convexity arguments [30] that  $X_0 = A^+ L_0$  is the unique optimal solution to the problem in (7).  $\square$

### 6.6 Proof to Theorem 3.5

*Proof.* Since  $A_0 = U_0 \Sigma_0^{\frac{1}{2}} Q^T$  and  $X_0 = Q \Sigma_0^{\frac{1}{2}} V_0^T$ , we have the following: 1)  $A_0 X_0 = L_0$ ; 2)  $L_0 \in \text{span}\{A_0\}$  and  $A_0$  is  $\Omega$ -isomeric; 3)  $L_0^T \in \text{span}\{X_0^T\}$  and  $X_0^T$  is  $\Omega^T$ -isomeric. By Theorem 3.4,

$$X_0 = Q \Sigma_0^{\frac{1}{2}} V_0^T = A_0^+ L_0 = \arg \min_X \|X\|_F^2, \text{ s.t. } \mathcal{P}_\Omega(A_0 X - L_0) = 0,$$

$$A_0 = U_0 \Sigma_0^{\frac{1}{2}} Q^T = L_0 X_0^+ = \arg \min_A \|A\|_F^2, \text{ s.t. } \mathcal{P}_\Omega(A X_0 - L_0) = 0.$$

Hence,  $(A_0, X_0)$  is a critical point to the problem in (8).  $\square$

### 6.7 Proof to Theorem 3.6

*Proof.* Since  $A_0 = U_0 \Sigma_0^{\frac{2}{3}} Q^T$  and  $X_0 = Q \Sigma_0^{\frac{1}{3}} V_0^T$ , we have the following: 1)  $A_0 X_0 = L_0$ ; 2)  $L_0 \in \text{span}\{A_0\}$  and  $A_0$  is  $\Omega$ -isomeric; 3)  $L_0^T \in \text{span}\{X_0^T\}$  and  $X_0^T$  is  $\Omega^T$ -isomeric. By Theorem 3.4,

$$\begin{aligned} X_0 &= Q \Sigma_0^{\frac{1}{3}} V_0^T = A_0^+ L_0 \\ &= \arg \min_X \frac{1}{2} \|X\|_F^2, \text{ s.t. } \mathcal{P}_\Omega(A_0 X - L_0) = 0. \end{aligned}$$

By Lemma 6.9,

$$\begin{aligned} A_0 &= U_0 \Sigma_0^{\frac{2}{3}} Q^T = L_0 X_0^+ \\ &= \arg \min_A \|A\|_*, \text{ s.t. } \mathcal{P}_\Omega(A X_0 - L_0) = 0. \end{aligned}$$

Hence,  $(A_0, X_0)$  is a critical point to the problem in (9).  $\square$
